# Supplementary material for: Synthesis, structure and properties of 2D lanthanide coordination polymers based on N-heterocyclic arylpolycarboxylate ligands
Source: Royal Society of Chemistry journal article supplement (doi:10.1039/c4dt02517b), 2014-01-01
Supplement: c4dt02517b1.pdf [file c4dt02517b1.pdf]

# Synthesis, Structure and Properties of 2D Lanthanide Coordination Polymers Based on *N*-heterocyclic Arylpolycarboxylate Ligands

Li-Xin You, Shu-Ju Wang, Gang Xiong, Fu Ding, Katrien W. Meert, Dirk Poelman, Philippe F. Smet, Bao-Yi Ren, Yan-Wen Tian, and Ya-Guang Sun\*

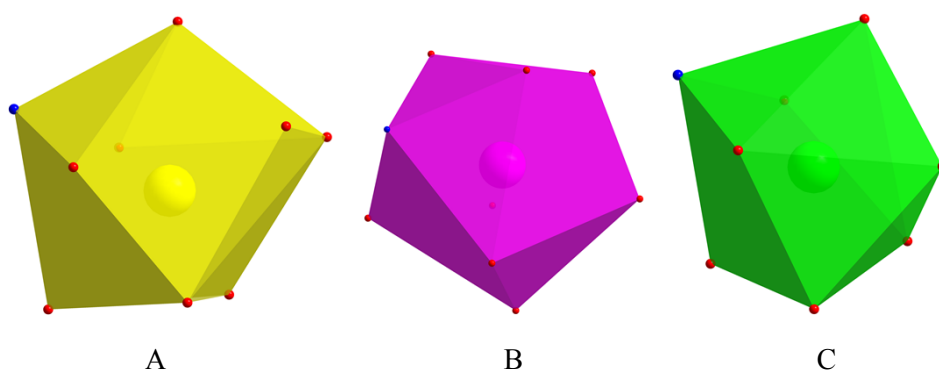

Fig.S1 Geometric configuration of 1(A), 3(B) and 7(C).

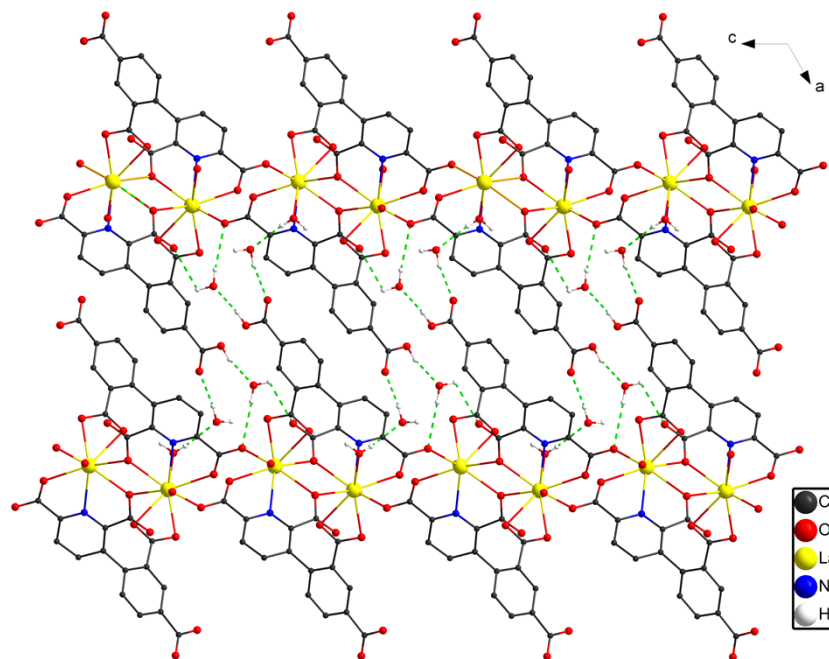

Fig.S2 Three-dimensional framework via hydrogen bonding interaction of 1.

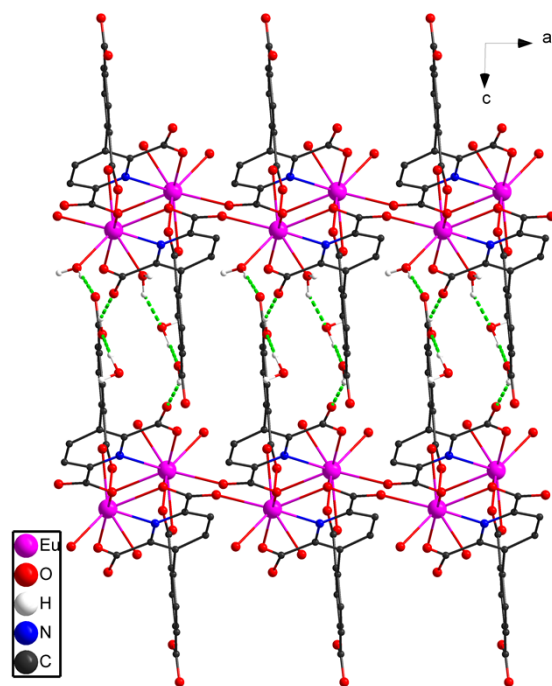

**Fig.S3** Three-dimensional framework via hydrogen bonding interaction of 3.

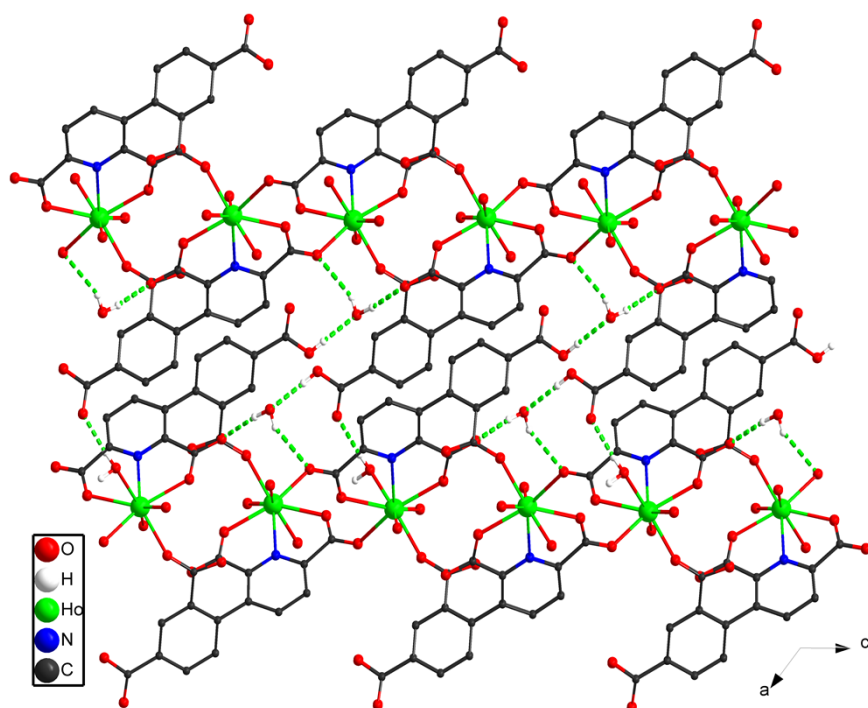

**Fig. S4** Three-dimensional framework via hydrogen bonding interaction of 7.

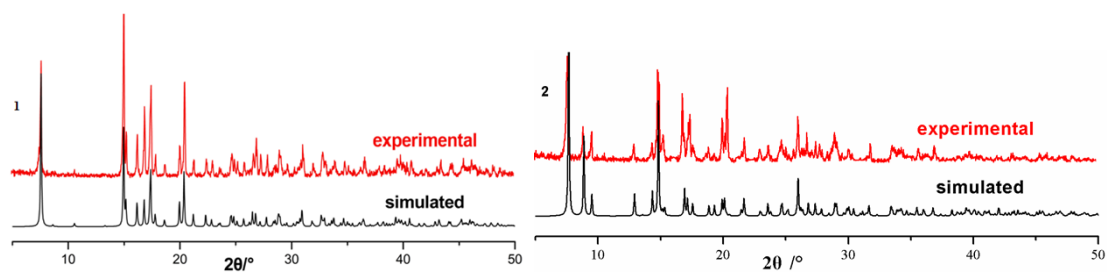

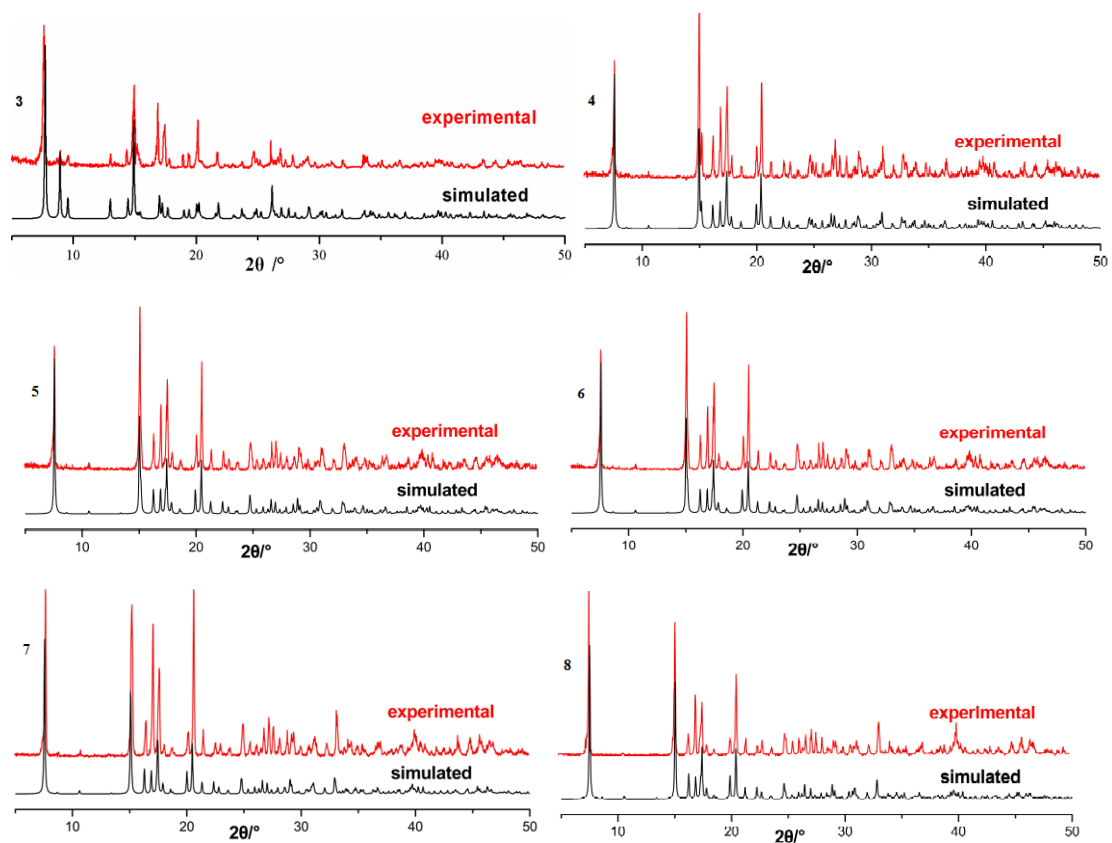

Fig.S5 The simulated and experimental PXRD patterns of 1-8.

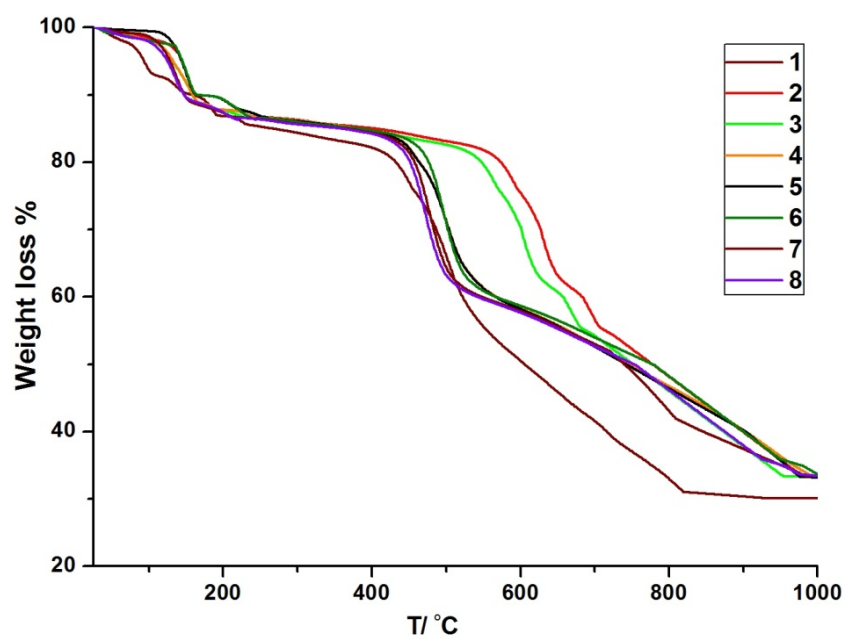

Fig. S6 TGA curves of 1-8.

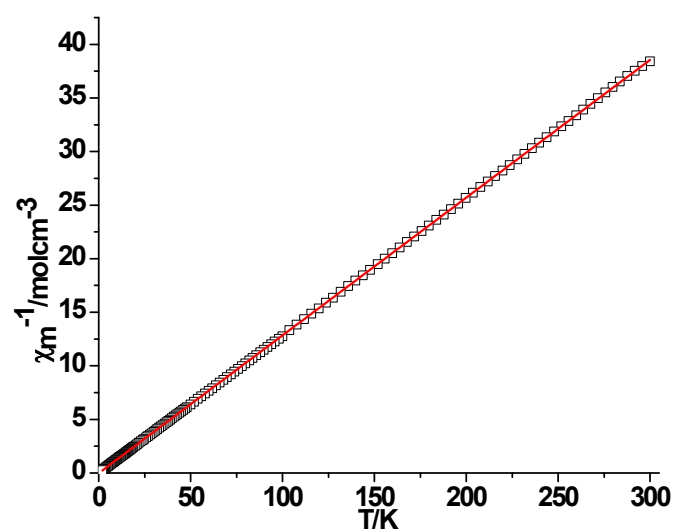

Fig. S7  $\chi_m^{-1}$  vs.  $T$  curve for 4.

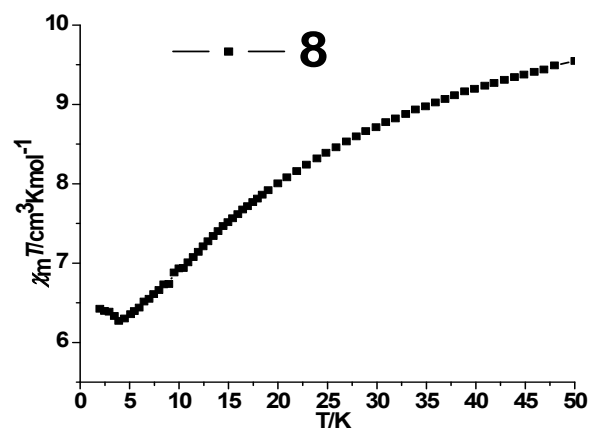

Fig. S8 Plot of  $\chi_m T$  vs.  $T$  for 8 in the temperature range from 2 to 50 K.

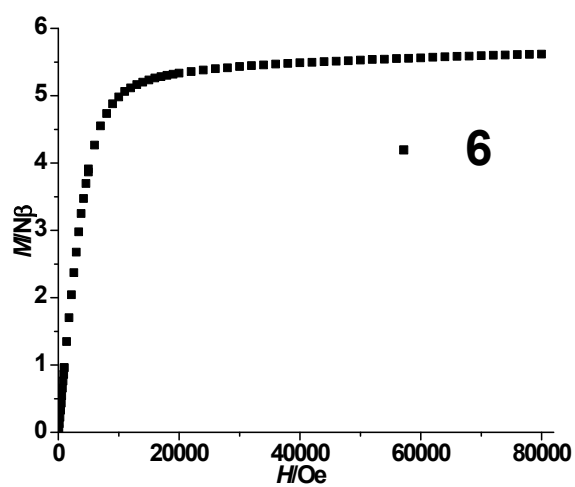

Fig. S9  $M$  vs.  $H$  curve of 6.

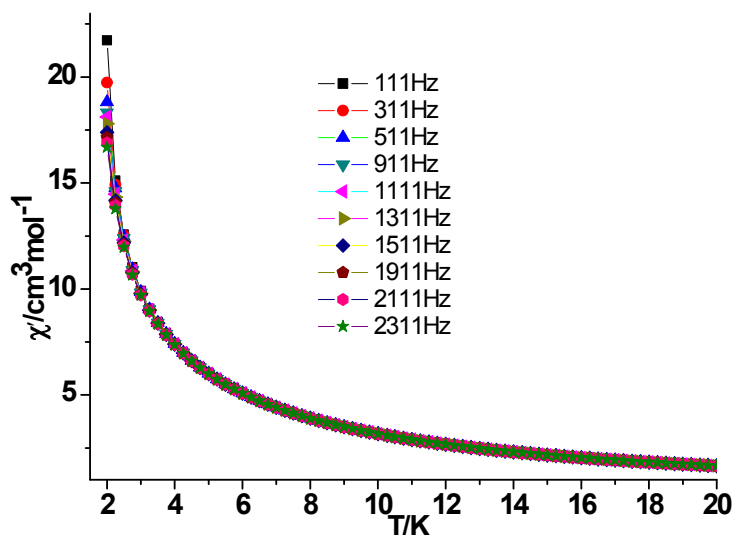

**Fig. S10** Temperature dependence of the in-phase ( $\chi'$ ) ac susceptibility components at different frequencies for **6** at zero dc field.

Eq.1:

$$\chi_{sm} = \frac{2N\beta}{3kTx} \frac{2.143x + 7.347 + (42.92x + 1.641)e^{-3.5x} + (283.7x - 0.6571)e^{-8x} + (620.6x - 1.94)e^{-13.5x} + (1122x - 2.835)e^{-20x} + (1813x - 3.556)e^{-27.5x}}{3 + 4e^{-3.5x} + 5e^{-8x} + 6e^{-13.5x} + 7e^{-20x} + 8e^{-27.5x}}$$

$$x = \lambda/kT$$

N is Avogadro's number;

k is Boltzmann constant;

$\beta$  is Bohr magneton.

Table S1. Bond lengths [ $\text{\AA}$ ] and angles [deg] for **1-8**.

| La                |          |                   |           |
|-------------------|----------|-------------------|-----------|
| O(9)-La(1)        | 2.593(3) | La(1)-O(2)        | 2.543(2)  |
| O(10)-La(1)       | 2.604(2) | La(1)-O(6)        | 2.564(2)  |
| O(4)-La(1)#1      | 2.474(2) | La(1)-O(2)#3      | 2.621(2)  |
| La(1)-O(3)        | 2.525(2) | La(1)-O(5)        | 2.666(2)  |
| La(1)-N(1)        | 2.693(2) |                   |           |
| O(4)#2-La(1)-O(3) | 70.27(7) | O(6)-La(1)-O(2)#3 | 102.98(7) |

|                     |           |                    |           |
|---------------------|-----------|--------------------|-----------|
| O(4)#2-La(1)-O(2)   | 147.60(7) | O(9)-La(1)-O(2)#3  | 134.86(8) |
| O(3)-La(1)-O(2)     | 121.47(7) | O(10)-La(1)-O(2)#3 | 72.25(7)  |
| O(4)#2-La(1)-O(6)   | 76.15(7)  | O(4)#2-La(1)-O(5)  | 115.46(7) |
| O(3)-La(1)-O(6)     | 93.74(7)  | O(3)-La(1)-O(5)    | 134.51(7) |
| O(2)-La(1)-O(6)     | 128.06(7) | O(2)-La(1)-O(5)    | 79.12(7)  |
| O(4)#2-La(1)-O(9)   | 124.46(9) | O(6)-La(1)-O(5)    | 49.97(7)  |
| O(3)-La(1)-O(9)     | 71.30(8)  | O(9)-La(1)-O(5)    | 69.78(8)  |
| O(2)-La(1)-O(9)     | 87.27(9)  | O(10)-La(1)-O(5)   | 142.66(7) |
| O(6)-La(1)-O(9)     | 68.01(9)  | O(2)#3-La(1)-O(5)  | 71.61(7)  |
| O(4)#2-La(1)-O(10)  | 75.37(8)  | O(4)#2-La(1)-N(1)  | 123.93(7) |
| O(3)-La(1)-O(10)    | 82.69(8)  | O(3)-La(1)-N(1)    | 61.69(7)  |
| O(2)-La(1)-O(10)    | 76.54(7)  | O(2)-La(1)-N(1)    | 59.88(7)  |
| O(6)-La(1)-O(10)    | 150.79(8) | O(6)-La(1)-N(1)    | 131.59(8) |
| O(9)-La(1)-O(10)    | 135.88(8) | O(9)-La(1)-N(1)    | 64.77(8)  |
| O(4)#2-La(1)-O(2)#3 | 92.92(7)  | O(10)-La(1)-N(1)   | 71.64(7)  |
| O(3)-La(1)-O(2)#3   | 152.85(7) | O(2)#3-La(1)-N(1)  | 117.45(7) |
| O(2)-La(1)-O(2)#3   | 63.11(8)  | O(5)-La(1)-N(1)    | 118.40(7) |

#1: -x,y+1/2,-z+3/2; #2: -x,y-1/2,-z+3/2; #3: -x,-y+1,-z+2; #4: -x,-y+2,-z+2

| Sm               |           |                   |            |
|------------------|-----------|-------------------|------------|
| Sm(1)-O(6)       | 2.382(4)  | Sm(1)-O(8)#3      | 2.527(4)   |
| Sm(1)-O(10)      | 2.475(5)  | Sm(1)-O(8)        | 2.554(4)   |
| Sm(1)-O(9)       | 2.477(4)  | Sm(1)-N(1)        | 2.564(5)   |
| Sm(1)-O(7)#1     | 2.496(4)  | Sm(1)-O(4)#2      | 2.572(4)   |
| Sm(1)-O(3)#2     | 2.503(4)  | O(7)-Sm(1)#4      | 2.496(4)   |
| O(6)-Sm(1)-O(10) | 77.23(15) | O(7)#1-Sm(1)-O(8) | 145.99(13) |
| O(6)-Sm(1)-O(9)  | 81.16(15) | O(3)#2-Sm(1)-O(8) | 74.07(13)  |
| O(10)-Sm(1)-O(9) | 68.10(15) | O(8)#3-Sm(1)-O(8) | 64.60(15)  |

|                     |            |                     |            |
|---------------------|------------|---------------------|------------|
| O(6)-Sm(1)-O(7)#1   | 79.94(14)  | O(6)-Sm(1)-N(1)     | 63.58(15)  |
| O(10)-Sm(1)-O(7)#1  | 71.32(15)  | O(10)-Sm(1)-N(1)    | 126.54(15) |
| O(9)-Sm(1)-O(7)#1   | 138.02(15) | O(9)-Sm(1)-N(1)     | 71.07(15)  |
| O(6)-Sm(1)-O(3)#2   | 133.40(14) | O(7)#1-Sm(1)-N(1)   | 129.79(14) |
| O(10)-Sm(1)-O(3)#2  | 124.62(14) | O(3)#2-Sm(1)-N(1)   | 108.79(15) |
| O(9)-Sm(1)-O(3)#2   | 142.93(14) | O(8)#3-Sm(1)-N(1)   | 124.89(14) |
| O(7)#1-Sm(1)-O(3)#2 | 71.92(14)  | O(8)-Sm(1)-N(1)     | 63.43(13)  |
| O(6)-Sm(1)-O(8)#3   | 151.91(15) | O(6)-Sm(1)-O(4)#2   | 85.74(15)  |
| O(10)-Sm(1)-O(8)#3  | 77.72(14)  | O(10)-Sm(1)-O(4)#2  | 143.60(15) |
| O(9)-Sm(1)-O(8)#3   | 77.87(14)  | O(9)-Sm(1)-O(4)#2   | 140.85(15) |
| O(7)#1-Sm(1)-O(8)#3 | 103.72(13) | O(7)#1-Sm(1)-O(4)#2 | 74.18(15)  |
| O(3)#2-Sm(1)-O(8)#3 | 72.53(13)  | O(3)#2-Sm(1)-O(4)#2 | 51.50(13)  |
| O(6)-Sm(1)-O(8)     | 126.10(13) | O(8)#3-Sm(1)-O(4)#2 | 122.22(13) |
| O(10)-Sm(1)-O(8)    | 130.49(14) | O(8)-Sm(1)-O(4)#2   | 85.43(14)  |
| O(9)-Sm(1)-O(8)     | 73.33(14)  | N(1)-Sm(1)-O(4)#2   | 70.05(15)  |

#1: x+1,y,z; #2: -x+2,-y+1,-z+1; #3: -x+2,-y,-z+1; #4: x-1,y,z

| Eu                |          |                   |            |
|-------------------|----------|-------------------|------------|
| Eu(1)-O(3)        | 2.355(6) | Eu(1)-N(1)        | 2.533(7)   |
| Eu(1)-O(9)        | 2.447(7) | Eu(1)-O(1)        | 2.545(6)   |
| Eu(1)-O(10)       | 2.453(6) | Eu(1)-O(8)#2      | 2.558(6)   |
| Eu(1)-O(2)#1      | 2.469(6) | Eu(1)-Eu(1)#3     | 4.2619(16) |
| Eu(1)-O(7)#2      | 2.481(6) | O(2)-Eu(1)#4      | 2.469(6)   |
| Eu(1)-O(1)#3      | 2.514(6) |                   |            |
| O(3)-Eu(1)-O(9)   | 81.3(2)  | O(10)-Eu(1)-O(1)  | 130.8(2)   |
| O(3)-Eu(1)-O(10)  | 77.6(2)  | O(2)#1-Eu(1)-O(1) | 145.7(2)   |
| O(9)-Eu(1)-O(10)  | 68.3(2)  | O(7)#2-Eu(1)-O(1) | 73.86(19)  |
| O(3)-Eu(1)-O(2)#1 | 80.0(2)  | O(1)#3-Eu(1)-O(1) | 65.2(2)    |

|                     |            |                      |            |
|---------------------|------------|----------------------|------------|
| O(9)-Eu(1)-O(2)#1   | 137.8(2)   | N(1)-Eu(1)-O(1)      | 63.6(2)    |
| O(10)-Eu(1)-O(2)#1  | 70.9(2)    | O(3)-Eu(1)-O(8)#2    | 85.4(2)    |
| O(3)-Eu(1)-O(7)#2   | 133.1(2)   | O(9)-Eu(1)-O(8)#2    | 140.7(2)   |
| O(9)-Eu(1)-O(7)#2   | 143.1(2)   | O(10)-Eu(1)-O(8)#2   | 143.6(2)   |
| O(10)-Eu(1)-O(7)#2  | 124.2(2)   | O(2)#1-Eu(1)-O(8)#2  | 74.6(2)    |
| O(2)#1-Eu(1)-O(7)#2 | 71.8(2)    | O(7)#2-Eu(1)-O(8)#2  | 51.65(19)  |
| O(3)-Eu(1)-O(1)#3   | 151.6(2)   | O(1)#3-Eu(1)-O(8)#2  | 122.82(19) |
| O(9)-Eu(1)-O(1)#3   | 77.7(2)    | N(1)-Eu(1)-O(8)#2    | 69.9(2)    |
| O(10)-Eu(1)-O(1)#3  | 76.9(2)    | O(1)-Eu(1)-O(8)#2    | 85.1(2)    |
| O(2)#1-Eu(1)-O(1)#3 | 103.20(19) | O(3)-Eu(1)-Eu(1)#3   | 150.70(16) |
| O(7)#2-Eu(1)-O(1)#3 | 72.93(19)  | O(9)-Eu(1)-Eu(1)#3   | 73.00(16)  |
| O(3)-Eu(1)-N(1)     | 63.5(2)    | O(10)-Eu(1)-Eu(1)#3  | 104.91(16) |
| O(9)-Eu(1)-N(1)     | 71.0(2)    | O(2)#1-Eu(1)-Eu(1)#3 | 128.90(14) |
| O(10)-Eu(1)-N(1)    | 126.7(2)   | O(7)#2-Eu(1)-Eu(1)#3 | 70.17(14)  |
| O(2)#1-Eu(1)-N(1)   | 130.0(2)   | O(1)#3-Eu(1)-Eu(1)#3 | 32.83(13)  |
| O(7)#2-Eu(1)-N(1)   | 109.0(2)   | N(1)-Eu(1)-Eu(1)#3   | 94.32(16)  |
| O(1)#3-Eu(1)-N(1)   | 125.3(2)   | O(1)-Eu(1)-Eu(1)#3   | 32.38(13)  |
| O(3)-Eu(1)-O(1)     | 126.2(2)   | O(8)#2-Eu(1)-Eu(1)#3 | 105.56(15) |
| O(9)-Eu(1)-O(1)     | 73.7(2)    |                      |            |

#1: x+1,y,z; #2: -x+1,-y,-z+2; #3: -x+1,-y-1,-z+2; #4: x-1,y,z

| Gd                  |           |                   |            |
|---------------------|-----------|-------------------|------------|
| Gd(1)-O(6)#1        | 2.297(3)  | Gd(1)-O(9)        | 2.452(3)   |
| Gd(1)-O(1)          | 2.344(3)  | Gd(1)-O(3)        | 2.458(3)   |
| Gd(1)-O(4)#2        | 2.384(2)  | Gd(1)-N(1)        | 2.558(3)   |
| Gd(1)-O(10)         | 2.423(3)  | Gd(1)-O(11)       | 2.444(4)   |
| O(6)#1-Gd(1)-O(1)   | 91.37(10) | O(11)-Gd(1)-O(9)  | 145.49(12) |
| O(6)#1-Gd(1)-O(4)#2 | 77.82(9)  | O(6)#1-Gd(1)-O(3) | 127.58(10) |



|                    |            |                   |            |
|--------------------|------------|-------------------|------------|
| O(1)-Gd(1)-O(4)#2  | 154.47(10) | O(1)-Gd(1)-O(3)   | 127.06(8)  |
| O(6)#1-Gd(1)-O(10) | 141.55(10) | O(4)#2-Gd(1)-O(3) | 76.52(9)   |
| O(1)-Gd(1)-O(10)   | 95.41(11)  | O(10)-Gd(1)-O(3)  | 75.90(10)  |
| O(4)#2-Gd(1)-O(10) | 80.04(9)   | O(11)-Gd(1)-O(3)  | 73.62(12)  |
| O(6)#1-Gd(1)-O(11) | 71.73(12)  | O(9)-Gd(1)-O(3)   | 140.02(9)  |
| O(1)-Gd(1)-O(11)   | 90.56(14)  | O(6)#1-Gd(1)-N(1) | 137.70(10) |
| O(4)#2-Gd(1)-O(11) | 107.43(12) | O(1)-Gd(1)-N(1)   | 63.65(9)   |
| O(10)-Gd(1)-O(11)  | 145.68(12) | O(4)#2-Gd(1)-N(1) | 137.75(9)  |
| O(6)#1-Gd(1)-O(9)  | 77.80(10)  | O(10)-Gd(1)-N(1)  | 77.73(10)  |
| O(1)-Gd(1)-O(9)    | 74.14(10)  | O(11)-Gd(1)-N(1)  | 74.82(12)  |
| O(4)#2-Gd(1)-O(9)  | 80.94(9)   | O(9)-Gd(1)-N(1)   | 121.71(9)  |
| O(10)-Gd(1)-O(9)   | 67.92(10)  | O(3)-Gd(1)-N(1)   | 63.46(8)   |

#1: -x+2,-y+1,-z+2; #2: -x+2,y-1/2,-z+3/2; #3: -x+2,y+1/2,-z+3/2

| Tb                  |            |                   |            |
|---------------------|------------|-------------------|------------|
| Tb(1)-O(6)#1        | 2.277(5)   | Tb(1)-O(11)       | 2.427(5)   |
| Tb(1)-O(3)          | 2.321(5)   | Tb(1)-O(2)        | 2.436(5)   |
| Tb(1)-O(1)#2        | 2.368(5)   | Tb(1)-N(1)        | 2.527(5)   |
| Tb(1)-O(9)          | 2.385(5)   | Tb(1)-O(10)       | 2.402(6)   |
| O(6)#1-Tb(1)-O(3)   | 90.9(2)    | O(10)-Tb(1)-O(11) | 145.8(2)   |
| O(6)#1-Tb(1)-O(1)#2 | 77.55(19)  | O(6)#1-Tb(1)-O(2) | 127.78(19) |
| O(3)-Tb(1)-O(1)#2   | 154.53(18) | O(3)-Tb(1)-O(2)   | 127.16(16) |
| O(6)#1-Tb(1)-O(9)   | 141.87(18) | O(1)#2-Tb(1)-O(2) | 76.64(17)  |
| O(3)-Tb(1)-O(9)     | 96.18(19)  | O(9)-Tb(1)-O(2)   | 75.26(18)  |
| O(1)#2-Tb(1)-O(9)   | 80.28(17)  | O(10)-Tb(1)-O(2)  | 73.4(2)    |
| O(6)#1-Tb(1)-O(10)  | 71.9(2)    | O(11)-Tb(1)-O(2)  | 139.72(18) |
| O(3)-Tb(1)-O(10)    | 90.5(2)    | O(6)#1-Tb(1)-N(1) | 137.76(19) |
| O(1)#2-Tb(1)-O(10)  | 107.0(2)   | O(3)-Tb(1)-N(1)   | 63.58(17)  |

|                    |           |                   |            |
|--------------------|-----------|-------------------|------------|
| O(9)-Tb(1)-O(10)   | 145.0(2)  | O(1)#2-Tb(1)-N(1) | 138.12(17) |
| O(6)#1-Tb(1)-O(11) | 77.49(18) | O(9)-Tb(1)-N(1)   | 77.36(18)  |
| O(3)-Tb(1)-O(11)   | 74.86(18) | O(10)-Tb(1)-N(1)  | 75.0(2)    |
| O(1)#2-Tb(1)-O(11) | 80.46(18) | O(11)-Tb(1)-N(1)  | 121.93(17) |
| O(9)-Tb(1)-O(11)   | 68.48(17) | O(2)-Tb(1)-N(1)   | 63.67(16)  |

#1: -x+1,-y+2,-z+2; #2 -x+1,y-1/2,-z+3/2; #3: -x+1,y+1/2,-z+3/2

| Dy                  |            |                   |            |
|---------------------|------------|-------------------|------------|
| Dy(1)-O(3)#1        | 2.263(2)   | Dy(1)-O(10)       | 2.423(2)   |
| Dy(1)-O(6)          | 2.322(2)   | Dy(1)-O(7)        | 2.439(2)   |
| Dy(1)-O(8)#2        | 2.357(2)   | Dy(1)-N(1)        | 2.516(3)   |
| Dy(1)-O(9)          | 2.393(2)   | Dy(1)-O(11)       | 2.408(3)   |
| O(3)#1-Dy(1)-O(6)   | 90.56(10)  | O(11)-Dy(1)-O(10) | 145.74(11) |
| O(3)#1-Dy(1)-O(8)#2 | 77.67(9)   | O(3)#1-Dy(1)-O(7) | 127.07(9)  |
| O(6)-Dy(1)-O(8)#2   | 153.96(8)  | O(6)-Dy(1)-O(7)   | 128.34(8)  |
| O(3)#1-Dy(1)-O(9)   | 141.82(9)  | O(8)#2-Dy(1)-O(7) | 76.07(8)   |
| O(6)-Dy(1)-O(9)     | 95.76(10)  | O(9)-Dy(1)-O(7)   | 76.08(9)   |
| O(8)#2-Dy(1)-O(9)   | 80.49(9)   | O(11)-Dy(1)-O(7)  | 73.45(11)  |
| O(3)#1-Dy(1)-O(11)  | 71.80(12)  | O(10)-Dy(1)-O(7)  | 139.79(9)  |
| O(6)-Dy(1)-O(11)    | 90.49(12)  | O(3)#1-Dy(1)-N(1) | 137.60(9)  |
| O(8)#2-Dy(1)-O(11)  | 107.29(12) | O(6)-Dy(1)-N(1)   | 64.16(8)   |
| O(9)-Dy(1)-O(11)    | 145.39(11) | O(8)#2-Dy(1)-N(1) | 138.08(8)  |
| O(3)#1-Dy(1)-O(10)  | 77.82(9)   | O(9)-Dy(1)-N(1)   | 77.45(9)   |
| O(6)-Dy(1)-O(10)    | 74.10(9)   | O(11)-Dy(1)-N(1)  | 74.83(12)  |
| O(8)#2-Dy(1)-O(10)  | 80.70(9)   | O(10)-Dy(1)-N(1)  | 121.71(9)  |
| O(9)-Dy(1)-O(10)    | 67.97(9)   | O(7)-Dy(1)-N(1)   | 64.28(8)   |

#1: -x+1,-y,-z+1; #2: -x+1,y+1/2,-z+3/2; #3: -x+1,y-1/2,-z+3/2

Ho

|                                                                                      |            |                     |            |
|--------------------------------------------------------------------------------------|------------|---------------------|------------|
| Ho(1)-O(5)#1                                                                         | 2.258(3)   | Ho(1)-O(2)#2        | 2.425(3)   |
| Ho(1)-O(3)#2                                                                         | 2.306(3)   | Ho(1)-N(1)#2        | 2.503(3)   |
| Ho(1)-O(1)                                                                           | 2.336(3)   | Ho(1)-O(9)          | 2.392(4)   |
| Ho(1)-O(10)                                                                          | 2.377(3)   | Ho(1)-O(11)         | 2.405(3)   |
| O(5)#1-Ho(1)-O(3)#2                                                                  | 90.43(12)  | O(9)-Ho(1)-O(11)    | 145.65(13) |
| O(5)#1-Ho(1)-O(1)                                                                    | 77.47(11)  | O(5)#1-Ho(1)-O(2)#2 | 126.79(12) |
| O(3)#2-Ho(1)-O(1)                                                                    | 153.83(11) | O(3)#2-Ho(1)-O(2)#2 | 128.62(11) |
| O(5)#1-Ho(1)-O(10)                                                                   | 141.84(12) | O(1)-Ho(1)-O(2)#2   | 76.06(10)  |
| O(3)#2-Ho(1)-O(10)                                                                   | 95.80(12)  | O(10)-Ho(1)-O(2)#2  | 76.34(11)  |
| O(1)-Ho(1)-O(10)                                                                     | 80.73(11)  | O(9)-Ho(1)-O(2)#2   | 73.32(13)  |
| O(5)#1-Ho(1)-O(9)                                                                    | 71.78(13)  | O(11)-Ho(1)-O(2)#2  | 139.91(12) |
| O(3)#2-Ho(1)-O(9)                                                                    | 90.41(15)  | O(5)#1-Ho(1)-N(1)#2 | 137.64(12) |
| O(1)-Ho(1)-O(9)                                                                      | 107.23(14) | O(3)#2-Ho(1)-N(1)#2 | 64.35(11)  |
| O(10)-Ho(1)-O(9)                                                                     | 145.42(13) | O(1)-Ho(1)-N(1)#2   | 138.17(11) |
| O(5)#1-Ho(1)-O(11)                                                                   | 77.71(12)  | O(10)-Ho(1)-N(1)#2  | 77.39(11)  |
| O(3)#2-Ho(1)-O(11)                                                                   | 74.20(12)  | O(9)-Ho(1)-N(1)#2   | 74.83(13)  |
| O(1)-Ho(1)-O(11)                                                                     | 80.53(11)  | O(11)-Ho(1)-N(1)#2  | 121.93(11) |
| O(10)-Ho(1)-O(11)                                                                    | 68.03(12)  | O(2)#2-Ho(1)-N(1)#2 | 64.39(10)  |
| #1: x,-y+1/2,z-1/2; #2: -x+1,y+1/2,-z+1/2; #3: -x+1,y-1/2,-z+1/2; #4: x,-y+1/2,z+1/2 |            |                     |            |

| Er                  |            |                    |            |
|---------------------|------------|--------------------|------------|
| Er(1)-O(3)#1        | 2.262(5)   | Er(1)-O(9)         | 2.392(5)   |
| Er(1)-O(6)          | 2.303(5)   | Er(1)-O(11)        | 2.415(4)   |
| Er(1)-O(8)#2        | 2.346(4)   | Er(1)-O(7)         | 2.439(4)   |
| Er(1)-O(10)         | 2.370(4)   | Er(1)-N(1)         | 2.507(5)   |
| O(3)#1-Er(1)-O(6)   | 90.28(18)  | O(8)#2-Er(1)-O(11) | 80.21(15)  |
| O(3)#1-Er(1)-O(8)#2 | 77.52(16)  | O(10)-Er(1)-O(11)  | 68.50(15)  |
| O(6)-Er(1)-O(8)#2   | 153.60(16) | O(9)-Er(1)-O(11)   | 145.73(16) |

|                    |            |                   |            |
|--------------------|------------|-------------------|------------|
| O(3)#1-Er(1)-O(10) | 142.16(16) | O(3)#1-Er(1)-O(7) | 126.40(17) |
| O(6)-Er(1)-O(10)   | 96.11(17)  | O(6)-Er(1)-O(7)   | 129.12(16) |
| O(8)#2-Er(1)-O(10) | 80.56(15)  | O(8)#2-Er(1)-O(7) | 75.82(14)  |
| O(3)#1-Er(1)-O(9)  | 72.07(17)  | O(10)-Er(1)-O(7)  | 76.16(16)  |
| O(6)-Er(1)-O(9)    | 90.1(2)    | O(9)-Er(1)-O(7)   | 73.19(17)  |
| O(8)#2-Er(1)-O(9)  | 107.79(18) | O(11)-Er(1)-O(7)  | 139.91(15) |
| O(10)-Er(1)-O(9)   | 144.81(18) | O(3)#1-Er(1)-N(1) | 137.67(17) |
| O(3)#1-Er(1)-O(11) | 77.60(15)  | O(6)-Er(1)-N(1)   | 64.70(16)  |
| O(6)-Er(1)-O(11)   | 74.29(17)  | O(8)#2-Er(1)-N(1) | 138.03(14) |
| O(11)-Er(1)-N(1)   | 122.31(15) | O(10)-Er(1)-N(1)  | 77.21(16)  |
| O(7)-Er(1)-N(1)    | 64.55(15)  | O(9)-Er(1)-N(1)   | 74.31(18)  |

#1: -x,-y+2,-z+1; #2: -x,y-1/2,-z+3/2; #3: -x,y+1/2,-z+3/2
